# Supplementary material for: Biomimetic fabrication of superhydrophobic loofah sponge: robust for highly efficient oil–water separation in harsh environments
Source: Royal Society of Chemistry journal article supplement (doi:10.1039/c8ra04336a), 2018-01-01
Supplement: c8ra04336a1.pdf [file c8ra04336a1.pdf]

## Supporting Information

### **Biomimetic fabrication of superhydrophobic loofah sponge: robust for highly efficient oil-water separation at harsh environment**

Mingguang Yu<sup>a</sup>, Binbin Lin<sup>a</sup>, Shangxian Chen<sup>a</sup>, Qianjun Deng<sup>a</sup>, Guang Liu<sup>c</sup>, Qing Wang<sup>b\*</sup>

a. School of Materials Science and Energy Engineering, Foshan University, Foshan 528000, China.

b. State Key Laboratory of Pulp & Paper Engineering, South China University of Technology, Guangzhou 510640, China.

c. Sericultural & Agri-Food Research Institute, Guangdong Academy of Agricultural Sciences, Key Laboratory of Functional Foods, Ministry of Agriculture, Guangdong Key Laboratory of Agricultural Products Processing, Guangzhou 510610, China.

**\*Corresponding authors: wangqing\_1216@126.com**

**Movie S1.** Video of pristine loofah sponge swell in water.

**Movie S2.** Video of methylene blue dyed water droplets roll off from the as-prepared loofah surface.

**Movie S3.** Video of selective removing a layer of oil red dyed n-hexane on top of water using as-prepared loofah sponge.

**Movie S4.** Video of selectively absorbing the oil red dyed chloroform from the bottom of water using as-prepared loofah sponge.

**Movie S5.** Video of selectively separation oil microdroplets from surfactant-free oil-in-water emulsions using as-prepared loofah sponge.

**Movie S6.** Video of selectively separation of oily red dyed chloroform/n-hexane in 1M HCl solution using as-prepared loofah sponge.

**Movie S7.** Video of selectively separation of oily red dyed chloroform/n-hexane in 1M NaOH solution using as-prepared loofah sponge.

**Movie S8.** Video of selectively separation of oily red dyed chloroform/n-hexane in saturated NaCl solution using as-prepared loofah sponge.

**Movie S9.** Video of selectively separation of oily red dyed chloroform/n-hexane in hot water with higher than 95°C using as-prepared loofah sponge.

**Movie S10.** Video of sandpaper-abrasion test of as-prepared loofah sponge.

**Movie S11.** Video of finger-wipe test of as-prepared loofah sponge.

**Movie S12.** Video of anti-fouling and self-cleaning performances of as-prepared loofah sponge and the pristine loofah sponge.

Table.S1 XPS elements contents of loofah, WPU@loofah and SiO<sub>2</sub>@WPU modified

loofah

| Sample                      | XPS (atomic %) |       |      |      |
|-----------------------------|----------------|-------|------|------|
|                             | C              | O     | N    | Si   |
| loofa                       | 59.75          | 40.25 | 0    | 0    |
| WPU@loofa                   | 77.24          | 18.78 | 3.98 | 0    |
| SiO <sub>2</sub> @WPU@loofa | 75.97          | 18.31 | 3.26 | 2.46 |

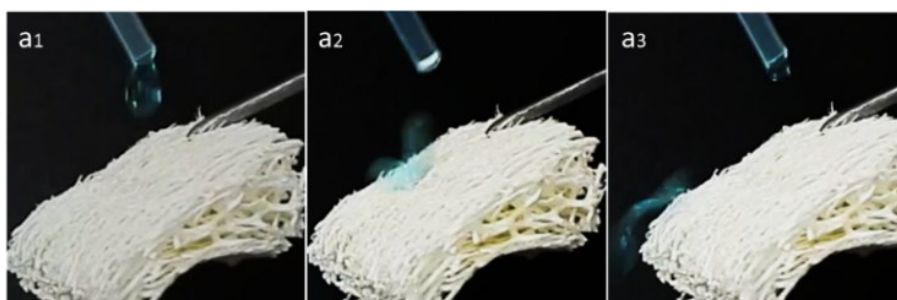

Fig. S1 Optical photos of a methylene blue dyed water droplet roll off from the as-prepared loofah surface

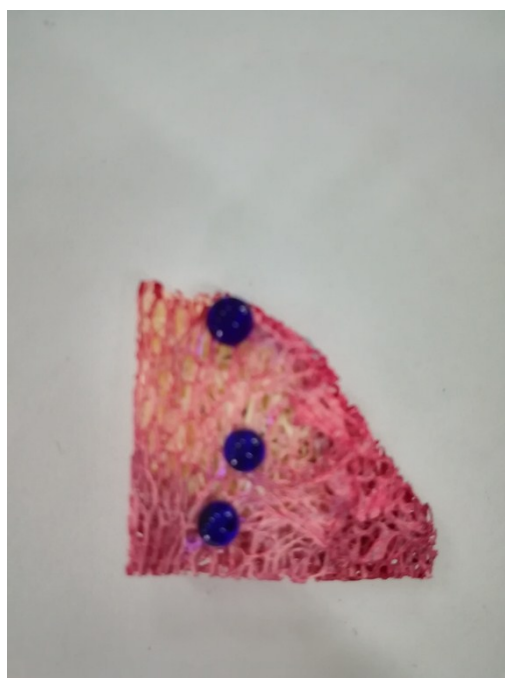

Fig.S2 Optical image of superhydrophobicity loofah sponge after 5 cycled oil-water separation

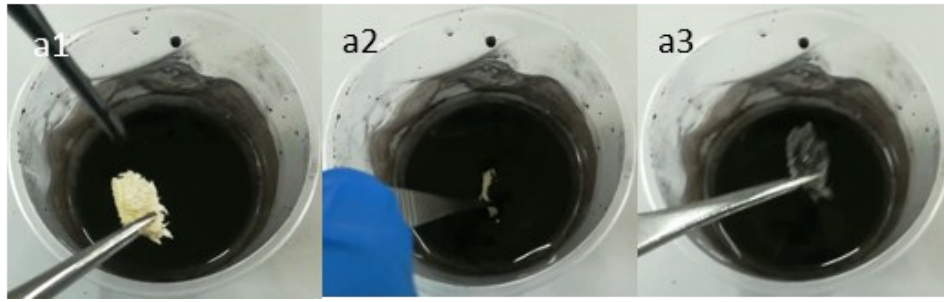

Fig.S3 Optical pictures of the anti-fouling performances of the pristine loofah sponge
